# Supplementary material
Source: PubMed Central journal article supplement (PMC3568591)
Supplement: AEM.03117-12_zam999104134so1.pdf [file AEM.03117-12_zam999104134so1.pdf]

**TABLE S1** Sampling locations, sampling dates, study design, and turbidity values for recovery and field deployment experiments, 2010-11

| Site Number | Site Name                                                             | Latitude and longitude       | Study dates                      | Study design <sup>a</sup> | Turbidity (NTRU)    | Initial pH            |
|-------------|-----------------------------------------------------------------------|------------------------------|----------------------------------|---------------------------|---------------------|-----------------------|
| 1           | Crystal Beach at Buckeye Lake, Ohio                                   | 39 55' 57"N,<br>082 28' 38"W | 7/27 and 7/29/10                 | single                    | 22 and 21           | 8.4 and 8.5           |
| 2           | Lake Erie at Edgewater, Cleveland, Ohio                               | 41 29' 21"N,<br>081 44' 24"W | 10/12, 11/3, 11/8/10;<br>8/10/10 | variability;<br>field     | 19, 8.8, 19;<br>6.0 | 8.3, 8.0,<br>8.2; 8.8 |
| 3           | Lake Erie at Vermillion West, Vermillion, Ohio                        | 41 25' 31"N,<br>082 21' 58"W | 4/19/11                          | single                    | 240                 | 8.2                   |
| 4           | Lake Erie at Villa Angela, Cleveland, Ohio                            | 41 35' 09"N,<br>081 34' 02"W | 5/9, 5/11/11;<br>8/10/10         | variability,<br>field     | 6.3, 11;<br>2.9     | 8.1;<br>8.8           |
| 5           | Lake Erie at Woodlawn Beach State Park, Hamburg, NY                   | 42 47' 22"N,<br>078 51' 09"W | 6/13/11                          | single                    | 110                 | 8.3                   |
| 6           | Lake Erie at Maumee Bay State Park, Oregon, Ohio                      | 41 41' 11"N,<br>083 22' 32"W | 7/17, 7/19/11                    | variability               | 19 and 25           | 8.6                   |
| 7           | Lake Huron at Lakeside Park, Port Huron, Michigan                     | 43 01' 13"N,<br>082 25' 44"W | 8/2/11                           | single                    | <5                  | 8.6                   |
| 8           | Lake Michigan at Red Arrow Park Beach, Manitowoc, Wis                 | 44 04' 34"N,<br>087 39' 20"W | 9/6/10                           | field                     | 100                 | 8.3                   |
| 9           | Lake Michigan at Hika Park Beach, Cleveland, Wis.                     | 43 54' 57"N,<br>087 43' 24"W | 9/6 and 9/7/10                   | field                     | 280 and<br>220      | 8.3 and 8.4           |
| 10          | Lake Michigan at Point Beach State Forest Concession Area Beach, Wis. | 44 13' 23"N,<br>087 30' 24"W | 9/8/10                           | field                     | 20                  | 8.4                   |
| 11          | Lake Michigan at YMCA, Manitowoc, Wis.                                | 44 05' 41"N,<br>087 39' 05"W | 9/9/10                           | field                     | 8.0                 | 8.1                   |
| 12          | Lake Michigan at Neshota Beach, Two Rivers, Wis.                      | 44 09' 03"N,<br>087 33' 10"W | 9/9/10                           | field                     | 13                  | 8.1                   |

<sup>a</sup> Single studies included one filtration for each filter type; variability studies included triplicate or quadruplicate filtrations for each filter type; field was the field deployment of the automatic ultrafiltration method
