# Supplementary material
Source: PubMed Central journal article supplement (PMC3568591)
Supplement: AEM.03117-12_zam999104134so3.pdf [file AEM.03117-12_zam999104134so3.pdf]

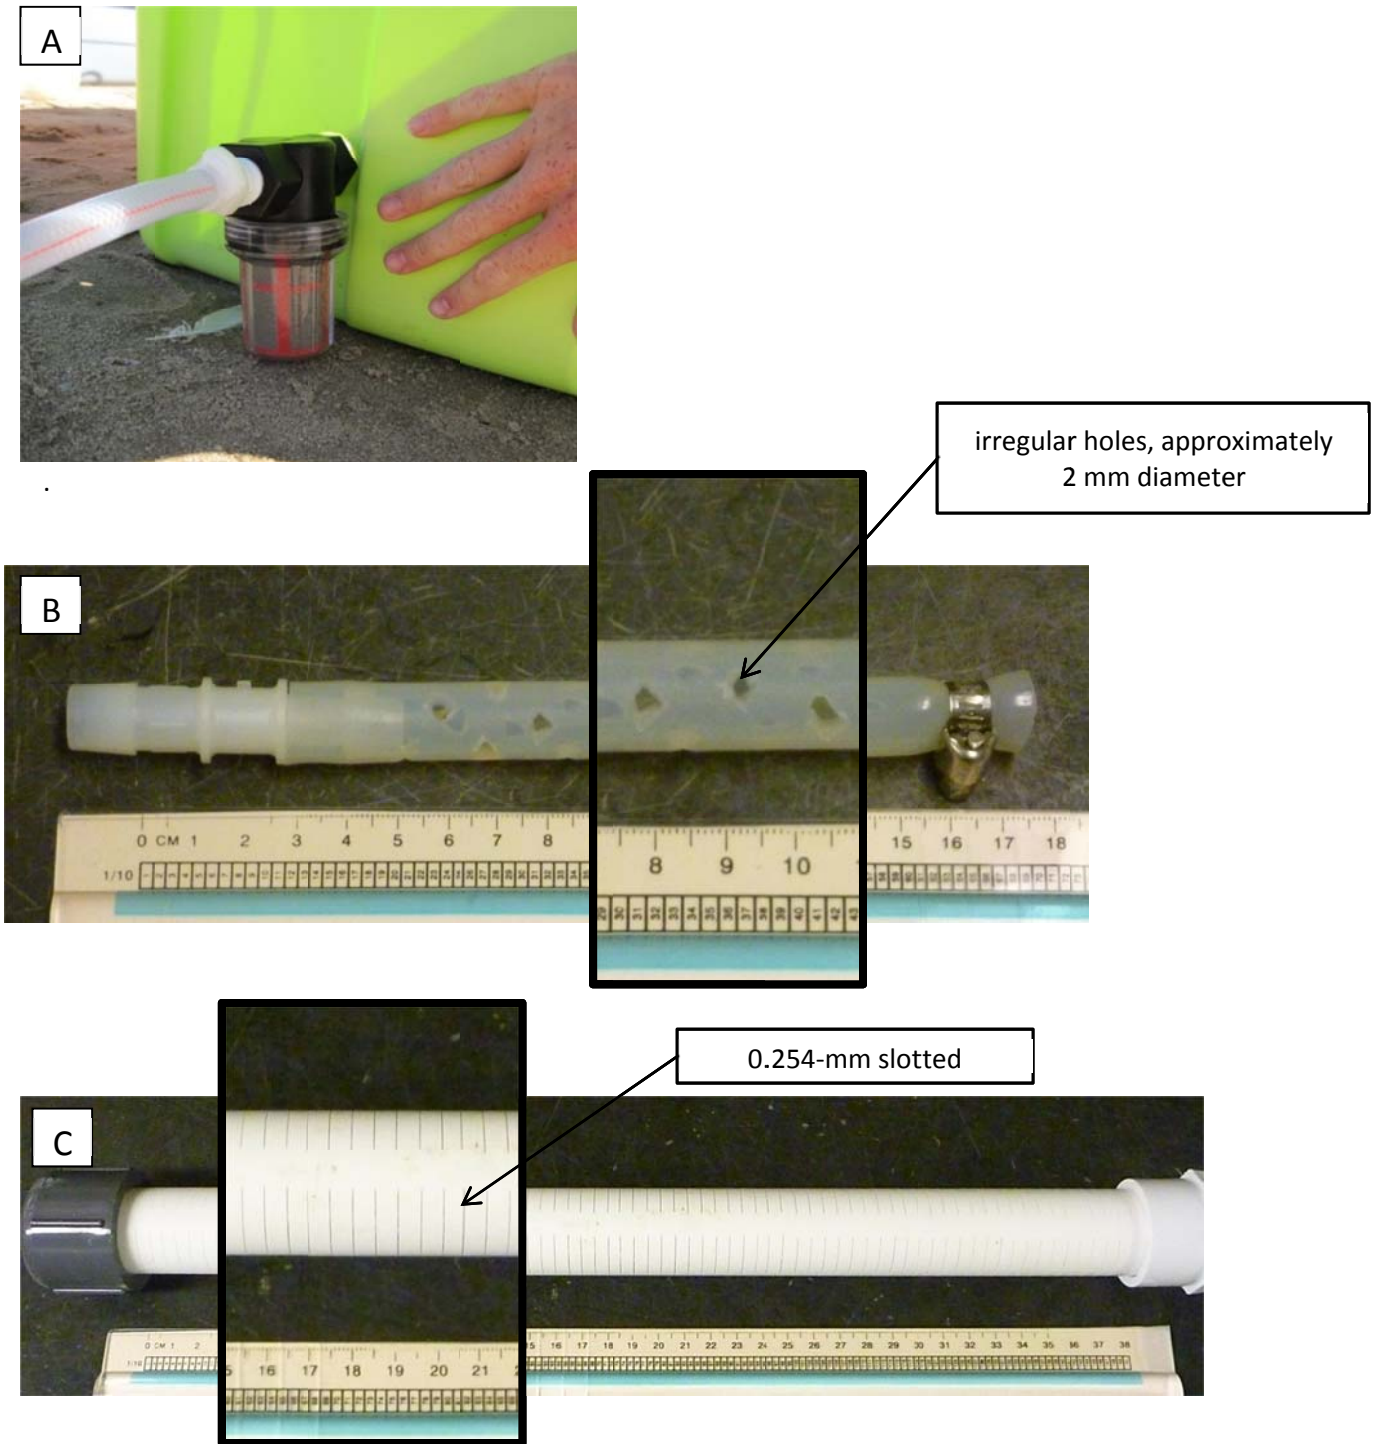

**FIG S6** Field equipment for reducing clogging of filtration systems by algae and other particles in lake-water samples: (A) Also pre-filter and (B) 14-cm long tubing end connector with irregular holes approximately 2 mm diameter (used in the present study) and (C) 40-cm long PVC end connector with 0.254 mm slotted openings (not used in the present study)
